# Supplementary material for: Inorganic ligand mediated synthesis of CuInS2 nanocrystals with tunable properties
Source: Royal Society of Chemistry journal article supplement (doi:10.1039/c2ce06668h), 2012-01-01
Supplement: c2ce06668h.pdf [file c2ce06668h.pdf]

Electronic Supplementary Information (ESI) for CrystEngComm  
This journal is © The Royal Society of Chemistry 2011

## Inorganic Ligands Mediated Synthesis of CuInS<sub>2</sub> Nanocrystals with Tunable Properties

Jing-Jing He, Wen-Hui Zhou<sup>\*</sup>, Jie Guo, Mei Li, Si-Xin Wu<sup>\*</sup>

The Key Laboratory for Special Functional Materials of MOE, Henan University,  
Kaifeng 475004, China

<sup>\*</sup>Corresponding author. E-mail: [zhouwh@henu.edu.cn](mailto:zhouwh@henu.edu.cn), [wusixin@henu.edu.cn](mailto:wusixin@henu.edu.cn)

### Contents:

**Fig.S1** TEM images and XRD pattern of the CuInS<sub>2</sub> NCs synthesized at different reaction temperatures for 60 min, [A, E(a)] 180 °C, [B, E(b)] 200 °C, [C, E(c)] 220 °C and [D, E(d)] 240 °C, respectively.

**Fig.S2** XRD patterns of CuInS<sub>2</sub> NCs synthesized at 200 °C by changing the reaction factors; (a) 0.00 mmol Sn(acac)<sub>2</sub>Cl<sub>2</sub> for 120 min; (b) 0.05 mmol Sn(acac)<sub>2</sub>Cl<sub>2</sub> for 60 min; (c) 0.1 mmol Sn(acac)<sub>2</sub>Cl<sub>2</sub> for 30 min, (d) 60 min and (e) 90 min, respectively; (f) 0.2 mmol Sn(acac)<sub>2</sub>Cl<sub>2</sub> for 120 min.

**Fig.S3** (A) The UV-Vis absorption spectra and corresponding band gap of CuInS<sub>2</sub> NCs obtained with different concentration of Sn(acac)<sub>2</sub>Cl<sub>2</sub>. (a) 0.00 mmol (b) 0.05 mmol and (c) 0.1 mmol Sn(acac)<sub>2</sub>Cl<sub>2</sub>, respectively. (B) TGA spectra of the CuInS<sub>2</sub> NCs with (a) and without (b) the participation of Sn(acac)<sub>2</sub>Cl<sub>2</sub> for 120 min.

**Fig.S4** The color changes of the mixture solution (A) with and (B) without the participation of Sn(acac)<sub>2</sub>Cl<sub>2</sub> at 200 °C, as time prolonged.

**Fig.S5** The HRTEM image of a single lute-like nanocrystal of CuInS<sub>2</sub> NCs obtained without the participation of Sn(acac)<sub>2</sub>Cl<sub>2</sub>.

**Tab.S1** Elemental composition values of CuInS<sub>2</sub> NCs obtained by changed the reaction concentration of Sn(acac)<sub>2</sub>Cl<sub>2</sub> according to the EDS measurement.

**Tab.S2** Elemental composition values of CuInS<sub>2</sub> NCs obtained by changed the reaction temperatures according to the EDS measurement.

**Tab.S3** Elemental composition values of CuInS<sub>2</sub> NCs obtained by changed the reaction times according to the EDS measurement.

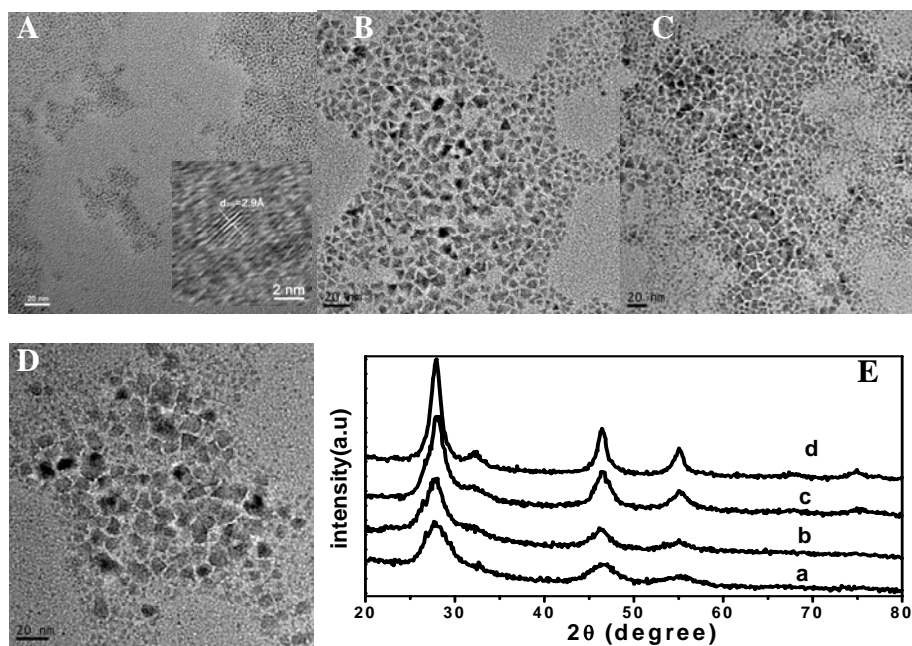

**Fig.S1** TEM images and XRD of the CuInS<sub>2</sub> NCs synthesized at different reaction temperatures for 60 min, (A, a) 180 °C, (B, b) 200 °C, (C, c) 220 °C and (D, d) 240 °C, respectively.

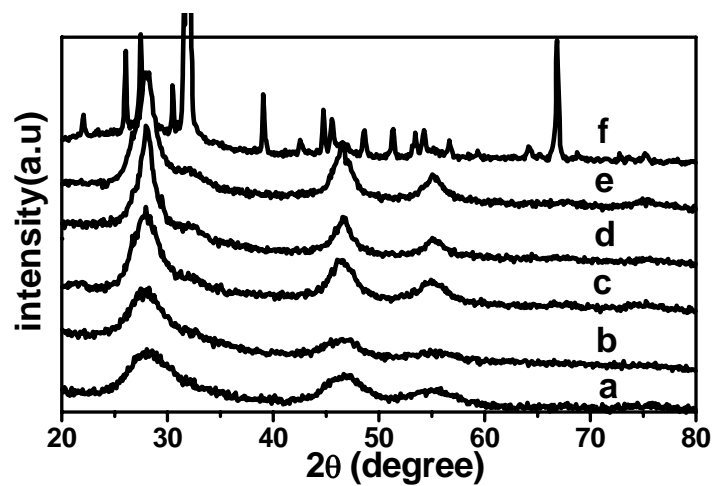

**Fig.S2** XRD patterns of CuInS<sub>2</sub> NCs synthesized at 200 °C by changing the reaction factors; (a) 0.00 mmol Sn(acac)<sub>2</sub>Cl<sub>2</sub> for 120 min; (b) 0.05 mmol Sn(acac)<sub>2</sub>Cl<sub>2</sub> for 60 min; (c) 0.1 mmol Sn(acac)<sub>2</sub>Cl<sub>2</sub> for 30 min, (d) 60 min and (e) 90 min, respectively; (f) 0.2 mmol Sn(acac)<sub>2</sub>Cl<sub>2</sub> for 120 min.

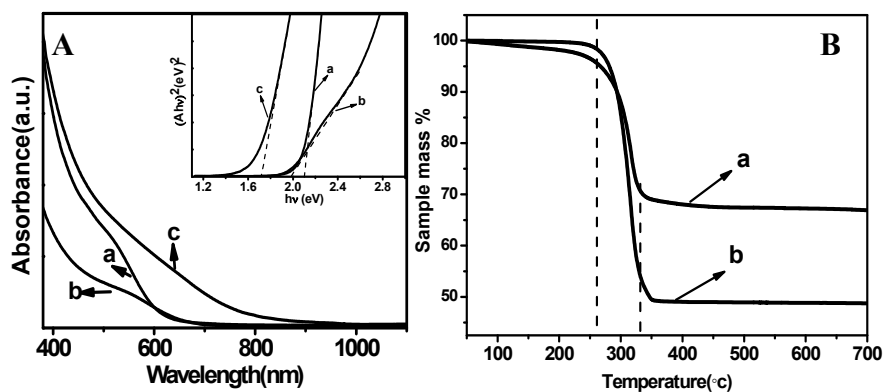

**Fig.S3** (A) The UV-Vis absorption spectra and corresponding band gap of CuInS<sub>2</sub> NCs obtained with different concentration of Sn(acac)<sub>2</sub>Cl<sub>2</sub>. (a) 0.00 mmol (b) 0.05 mmol and (c) 0.1 mmol Sn(acac)<sub>2</sub>Cl<sub>2</sub>, respectively. (B) TGA spectra of the CuInS<sub>2</sub> NCs with (a) and without (b) the participation of Sn(acac)<sub>2</sub>Cl<sub>2</sub> for 120 min.

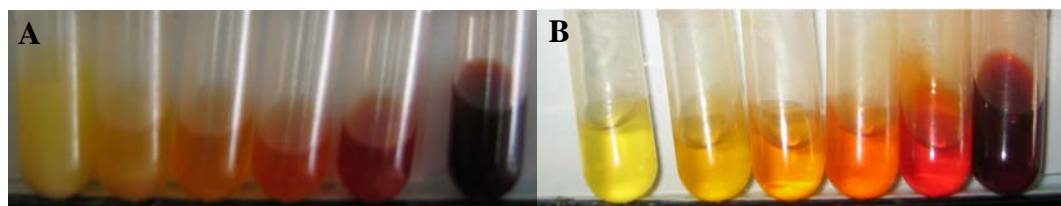

**Fig.S4** The color changes of the mixture solution (A) with and (B) without the participation of  $\text{Sn}(\text{acac})_2\text{Cl}_2$  at 200 °C, as time prolonged.

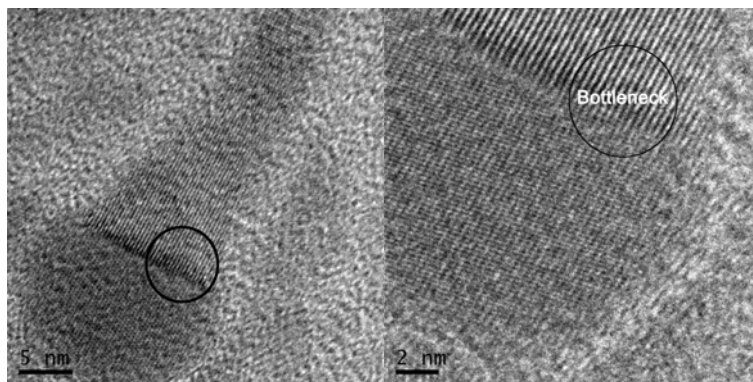

**Fig.S5** The HRTEM image of a single lute-like nanocrystal of CuInS<sub>2</sub> NCs obtained without the participation of Sn(acac)<sub>2</sub>Cl<sub>2</sub>.

**Tab.S1** Elemental composition values of CuInS<sub>2</sub> NCs obtained by changed the reaction concentration of Sn(acac)<sub>2</sub>Cl<sub>2</sub> according to the EDS measurement.

| <b>Area</b>                  | <b>0.00</b>              | <b>0.05</b>              | <b>0.10</b>              |
|------------------------------|--------------------------|--------------------------|--------------------------|
| <b>Area1(At %)Cu/ In/ S</b>  | <b>28.37/19.63/51.99</b> | <b>20.68/22.6/56.72</b>  | <b>27.44/22.28/50.28</b> |
| <b>Area2(At %)Cu/ In/ S</b>  | <b>22.55/21.70/53.52</b> | <b>26.84/25.50/47.66</b> | <b>22.36/22.71/54.93</b> |
| <b>Area3(At %)Cu/ In/ S</b>  | <b>25.27/16.46/53.89</b> | <b>29.89/17.88/52.24</b> | <b>23.92/22.51/53.57</b> |
| <b>Average(At%)Cu/ In/ S</b> | <b>25.23/20.56/53.61</b> | <b>25.80/21.99/52.21</b> | <b>24.57/22.50/52.93</b> |
| <b>Cu/ In/ S</b>             | <b>0.93/0.71/2.00</b>    | <b>0.99/0.84/2.00</b>    | <b>0.93/0.85/2.00</b>    |
| <b>Cu/In</b>                 | <b>1/0.81</b>            | <b>1/0.85</b>            | <b>1/0.92</b>            |

**Tab.S2** Elemental composition values of CuInS<sub>2</sub> NCs obtained by changed the reaction temperatures according to the EDS measurement.

| <b>Area</b>                   | <b>180 °C</b>            | <b>200 °C</b>            | <b>220 °C</b>            | <b>240 °C</b>            |
|-------------------------------|--------------------------|--------------------------|--------------------------|--------------------------|
| <b>Area1(At %)Cu/ In/ S</b>   | <b>32.03/19.01/48.96</b> | <b>27.44/22.28/50.28</b> | <b>24.51/25.86/49.32</b> | <b>26.08/23.38/51.54</b> |
| <b>Area2(At %)Cu/ In/ S</b>   | <b>27.11/19.85/53.04</b> | <b>22.36/22.71/54.93</b> | <b>24.32/23.95/51.73</b> | <b>25.61/20.12/54.27</b> |
| <b>Area3 (At %)Cu/ In/ S</b>  | <b>27.16/19.36/53.48</b> | <b>23.92/22.51/53.57</b> | <b>26.65/21.20/52.14</b> | <b>21.97/21.88/56.15</b> |
| <b>Average (At%)Cu/ In/ S</b> | <b>28.77/19.41/51.83</b> | <b>24.57/22.50/52.93</b> | <b>25.26/23.67/51.06</b> | <b>24.91/21.62/53.47</b> |
| <b>Cu/ In/ S</b>              | <b>1.11/0.75/2.00</b>    | <b>0.93/0.85/2.00</b>    | <b>0.99/0.93/2.00</b>    | <b>0.93/0.81/2.00</b>    |
| <b>Cu/In</b>                  | <b>1/0.67</b>            | <b>1/0.92</b>            | <b>1/0.94</b>            | <b>1/0.87/2.15</b>       |



**Tab.S3** Elemental composition values of CuInS<sub>2</sub> NCs obtained by changed the reaction times according to the EDS measurement.

| Area                  | 30 min            | 90 min            | 120 min                  |
|-----------------------|-------------------|-------------------|--------------------------|
| Area1(At %)Cu/ In/ S  | 24.20/20.53/55.27 | 23.87/24.88/51.26 | 21.49/22.13/53.50(2.89※) |
| Area2(At %)Cu/ In/ S  | 28.86/21.67/49.67 | 25.93/18.39/55.69 | 23.85/24.89/51.25(1.47※) |
| Area3(At %)Cu/ In/ S  | 25.86/18.46/55.68 | 18.80/24.00/57.20 | 23.37/21.7/52.48(2.44※)  |
| Average(At%)Cu/ In/ S | 26.31/20.22/53.54 | 22.87/22.41/54.72 | 22.80/23.06/52.41(2.67※) |
| Cu/ In/ S             | 0.98/0.76/2.00    | 0.84/0.82/2.00    | 0.87/0.88/2.00(0.08※)    |
| Cu/In                 | 1/0.77            | 1/0.98            | 1/1.01                   |

\* indicates a percentage value of Sn elemental, ※ ≤ 2 sigma.
